# Supplementary material
Source: Springer Nature journal article supplement (https://www.springermedizin.de/resource/supplementary/12876_2010_556_MOESM4_ESM.pdf/9437248)

**A**

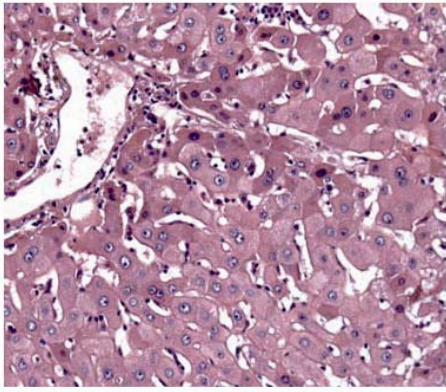

a

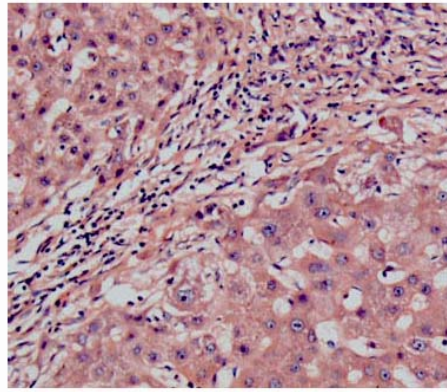

b

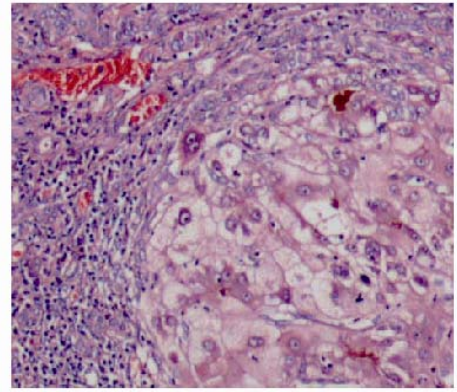

c

**B**

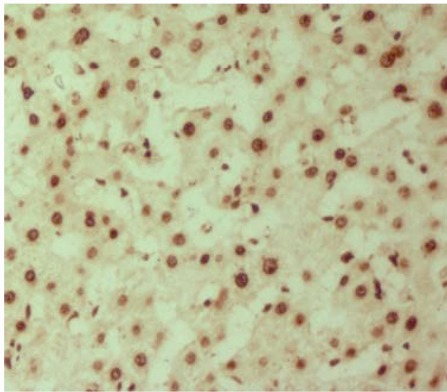

d

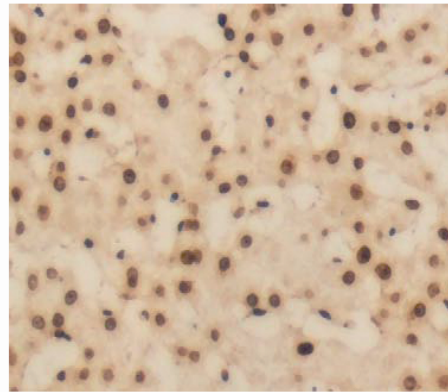

e

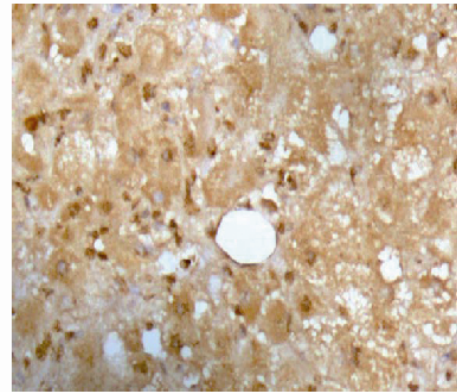

f

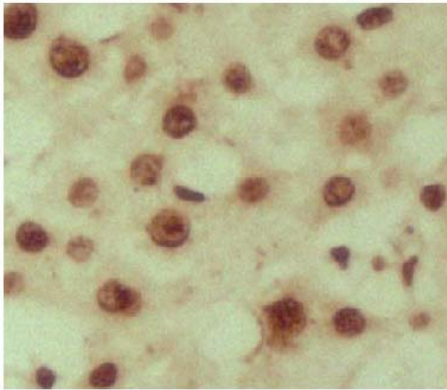

g

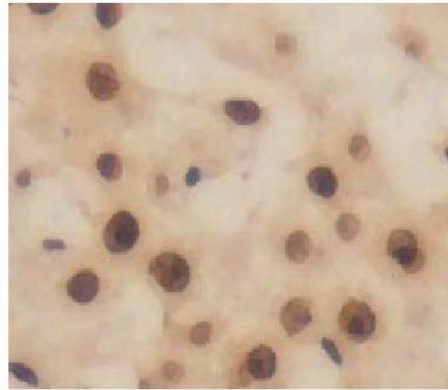

h

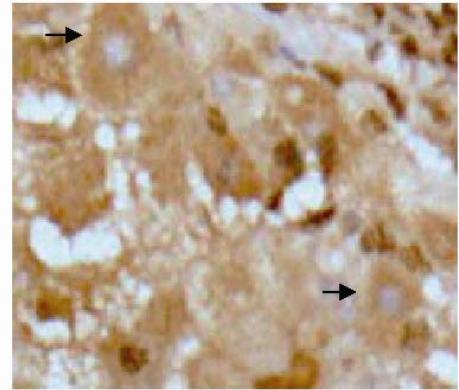

i

**C**

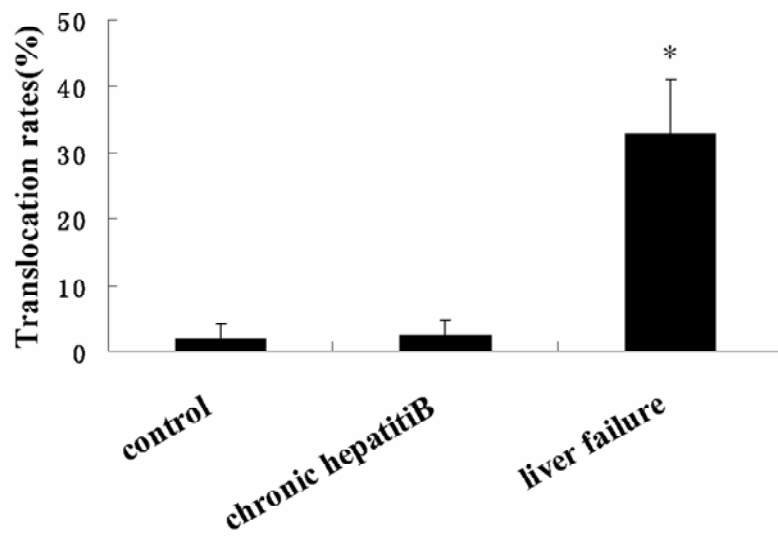

Supplement: MOESM4 [file 9437248]
